# Supplementary material
Source: MDPI journal article supplement (https://www.mdpi.com/2073-4441/14/3/303)
Supplement: s1 [file s1]

## Supplementary Material for Manuscript “Emissions of Building Materials—A Threat to the Environment?”

### Tables

Table S1: Rain and wind data of all analysed samples of site A.

Table S2: Rain and wind data of all analysed samples of site B.

**Table S1.** Rain and wind data of all analysed samples of site A. Degree: 0 ° = North

| Start of rain event | End of rain event | Rainfall<br>[mm] | Wind speed [m/s] |        | Wind direction [°] |
|---------------------|-------------------|------------------|------------------|--------|--------------------|
|                     |                   |                  | Average          | StdDev | Average            |
| 23.09.2018 08:30    | 23.09.2018 23:25  | 14,8             | 5,7              | 1,2    | 193                |
| 13.11.2018 04:45    | 13.11.2018 16:55  | 10,1             | 2,9              | 0,9    | 231                |
| 10.02.2019 09:45    | 11.02.2019 11:00  | 12,4             | 8,1              | 1,3    | 209                |
| 09.03.2019 06:20    | 11.03.2019 11:00  | 22,5             | 6,8              | 3,5    | 235                |
| 26.04.2019 23:25    | 27.04.2019 02:05  | 9,5              | 7,4              | 1,1    | 295                |
| 16.05.2019 00:10    | 17.05.2019 04:00  | 10,8             | 4,4              | 1,0    | 143                |
| 20.05.2019 15:30    | 20.05.2019 22:05  | 42,3             | 3,1              | 0,7    | 186                |
| 06.06.2019 14:20    | 06.06.2019 20:40  | 19,5             | 5,4              | 1,0    | 284                |
| 12.06.2019 17:40    | 13.06.2019 07:30  | 8,1              | 5,5              | 2,7    | 252                |
| 06.07.2019 18:35    | 06.07.2019 21:10  | 7,6              | 4,2              | 1,0    | 279                |
| 20.07.2019 21:50    | 21.07.2019 00:05  | 11,3             | 2,8              | 0,8    | 131                |
| 02.08.2019 15:15    | 02.08.2019 17:40  | 36,9             | 3,8              | 1,9    | 131                |
| 18.08.2019 06:00    | 18.08.2019 20:45  | 10,2             | 3,6              | 0,9    | 213                |
| 09.09.2019 03:00    | 09.09.2019 19:00  | 15,0             | 4,4              | 1,1    | 132                |
| 27.09.2019 07:20    | 30.09.2019 10:00  | 37,2             | 5,8              | 3,8    | 232                |
| 30.09.2019 16:00    | 02.10.2019 08:45  | 22,0             | 6,4              | 1,6    | 245                |
| 14.12.2019 11:00    | 15.12.2019 13:10  | 8,0              | 6,1              | 2,1    | 230                |
| 27.01.2020 22:20    | 29.01.2020 02:20  | 14,7             | 8,1              | 1,3    | 226                |
| 09.02.2020 20:40    | 11.02.2020 11:30  | 11,2             | 10,5             | 2,1    | 245                |
| 22.02.2020 19:30    | 23.02.2020 20:20  | 17,6             | 4,1              | 1,9    | 186                |

**Table S2.** Rain and wind data of all analysed samples of site B. Degree: 0 ° = North

| Start of rain event | End of rain event | Rainfall<br>[mm] | Wind speed [m/s] |        | Wind direction [°] |
|---------------------|-------------------|------------------|------------------|--------|--------------------|
|                     |                   |                  | Average          | StdDev | Average            |
| 10.02.2019 09:45    | 11.02.2019 09:15  | 12,2             | 6,8              | 1,0    | 201                |
| 09.03.2019 06:05    | 10.03.2019 22:15  | 19,1             | 4,2              | 2,6    | 221                |
| 13.03.2019 22:25    | 14.03.2019 23:40  | 9,1              | 6,0              | 1,7    | 223                |
| 27.04.2019 00:15    | 27.04.2019 01:55  | 2,7              | 5,8              | 0,3    | 287                |
| 15.05.2019 15:45    | 16.05.2019 20:35  | 10,5             | 2,6              | 0,6    | 78                 |
| 20.05.2019 16:35    | 20.05.2019 18:15  | 11,7             | 2,7              | 0,9    | 108                |
| 06.06.2019 14:55    | 06.06.2019 22:15  | 19,2             | 4,6              | 1,7    | 288                |
| 08.06.2019 05:50    | 12.06.2019 06:30  | 37,8             | 2,7              | 2,2    | 147                |
| 12.06.2019 18:40    | 12.06.2019 23:15  | 15,7             | 3,8              | 0,9    | 276                |
| 20.07.2019 22:30    | 21.07.2019 00:30  | 13,4             | 2,1              | 0,6    | 115                |
| 29.07.2019 16:50    | 29.07.2019 20:15  | 43,9             | 2,9              | 1,9    | 316                |
| 26.08.2019 19:00    | 26.08.2019 21:00  | 13,5             | 1,1              | 0,3    | 118                |
| 27.09.2019 08:20    | 30.09.2019 11:00  | 30,4             | 4,7              | 3,2    | 239                |
| 01.10.2019 06:00    | 02.10.2019 09:45  | 14,0             | 4,2              | 1,4    | 271                |
| 14.12.2019 11:10    | 15.12.2019 11:30  | 5,2              | 5,4              | 1,2    | 221                |
| 09.01.2020 01:30    | 11.01.2020 00:50  | 8,9              | 4,2              | 1,3    | 215                |
| 27.01.2020 21:30    | 29.01.2020 02:50  | 11,5             | 6,9              | 1,7    | 219                |
| 09.02.2020 21:00    | 11.02.2020 17:00  | 12,6             | 8,2              | 2,1    | 245                |
| 22.02.2020 19:10    | 23.02.2020 21:40  | 13,9             | 3,1              | 2,0    | 235                |
| 09.03.2020 14:45    | 11.03.2020 03:40  | 9,8              | 6,3              | 1,3    | 211                |
